# Supplementary material for: Impact of Biochar Amendment on Soil Properties and Organic Matter Composition in Trace Element-Contaminated Soil
Source: MDPI journal article supplement (doi:10.3390/ijerph19042140), 2022-02-14
Supplement: s1 [file s1]

**Impact of biochar amendment on soil properties and organic matter composition in trace element-contaminated soil**

**SUPPLEMENTARY MATERIAL:**

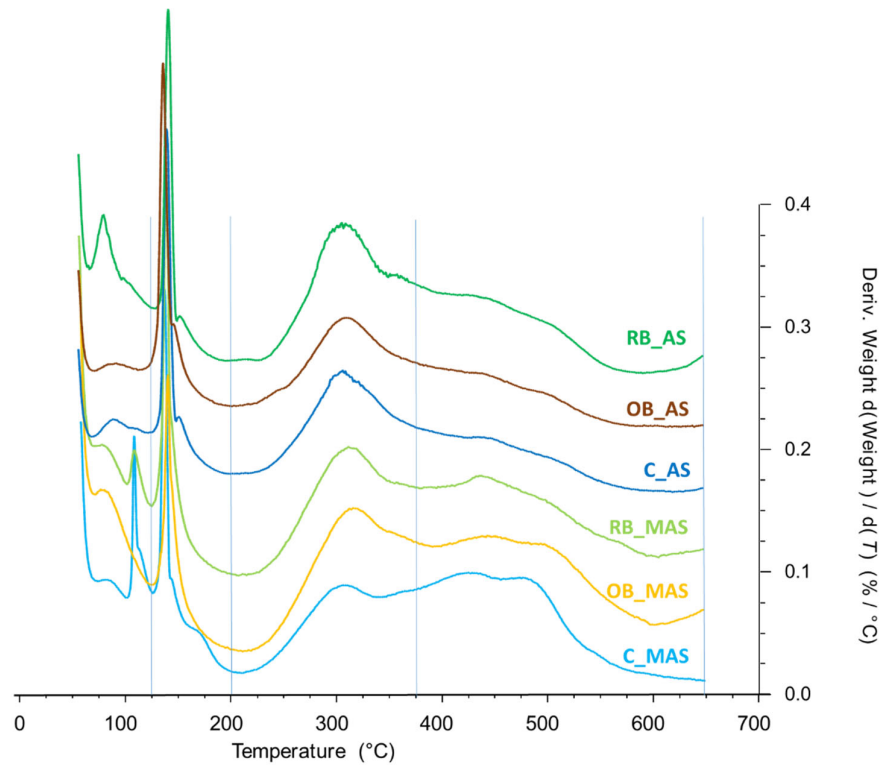

**Figure S1.** Derivative of weight loss vs. temperature from 50 to 650 °C of humic acids at a heating rate of 20 °C min<sup>-1</sup>

**Supplementary Table:**

**Table S1.** Assessment (%) of the different C types of humic acids as seen by <sup>13</sup>C NMR integration regions.

| Sample | 245-185 | 185-160 | 160-110 | 110-90 | 90-60 | 60-45 | 45-0 |
|--------|---------|---------|---------|--------|-------|-------|------|
| RB_MAS | 0       | 8       | 20      | 6      | 23    | 12    | 31   |
| OB_MAS | 0       | 9       | 21      | 6      | 20    | 12    | 32   |
| C_MAS  | 1       | 9       | 20      | 6      | 21    | 12    | 31   |
| RB_AS  | 1       | 11      | 22      | 5      | 17    | 12    | 33   |
| OB_AS  | 1       | 9       | 22      | 6      | 18    | 12    | 32   |
| C_AS   | 0       | 9       | 23      | 5      | 16    | 13    | 34   |

C region values are given in ppm.
